# Supplementary material
Source: PubMed Central journal article supplement (PMC9869459)
Supplement: NIHMS1845083-supplement-Supplemental_Data_File___doc___tif__pdf__etc__.pdf [file NIHMS1845083-supplement-Supplemental_Data_File___doc___tif__pdf__etc__.pdf]

## **Protocol-Driven Initiation and Weaning of High Flow Nasal Cannula for Patients with Bronchiolitis: A Quality Improvement Initiative**

Jia Xin Huang, MD<sup>a</sup>, Blair Colwell, MD<sup>a</sup>, Pranjali Vadlaputi<sup>a</sup>, Hadley Sauers-Ford<sup>a</sup>, Brian J Smith, MSc, RRT<sup>a</sup>, Heather McKnight, MD<sup>a</sup>, Jessica Witkowski, MD<sup>a</sup>, Andrew Padovani, PhD<sup>b</sup>, Sara Aghamohammadi, MD<sup>a</sup>, Leah Tzimenatos, MD<sup>a</sup>, Shelli Beck<sup>a</sup>, Kriston Reneau<sup>a</sup>, Barbara Nill<sup>a</sup>, Dawn Harbour<sup>a</sup>, Jessica Pegadiotes<sup>a</sup>, JoAnne Natale, MD, PhD<sup>a</sup>, Michelle Hamline, MD, PhD, MAS<sup>a</sup>, and Heather Siefkes, MD, MSCI<sup>a</sup>

**Affiliations:** <sup>a</sup>University of California Davis Children's Hospital <sup>b</sup>University of California, Davis

### **Address correspondence to:**

Heather Siefkes, MD, MSCI  
2516 Stockton Blvd  
Sacramento, CA 95817  
[hsiefkes@ucdavis.edu](mailto:hsiefkes@ucdavis.edu)

**Key words:** bronchiolitis, oxygen saturation, noninvasive ventilation, intensive care unit, length of stay, quality improvement

### **Conflict of Interest Disclosures** (includes financial disclosures)

The authors have indicated that they have no potential conflicts of interest to disclose.

**Funding/Support:** This project was made possible due to a UC Davis Children's Hospital Employee and Donor Gift fund to the PICU and an institution resident research grant. Dr. Siefkes was supported by the National Center for Advancing Translational Sciences (NCATS), National Institutes of Health (NIH), through grant number UL1 TR001860 and linked award KL2 TR001859. The content is solely the responsibility of the authors and does not necessarily represent the official views of the NIH. The NIH had no role in the design or oversight of the study. The project described was supported by the NCATS, NIH, through grant UL1 TR000002.

## Supplemental Files Table of Content

|          |   |
|----------|---|
| eFigure1 | 3 |
| eFigure2 | 4 |
| eTable1  | 6 |

eFigure 1: Institutional protocol for patients on high flow nasal cannula (HFNC) therapy

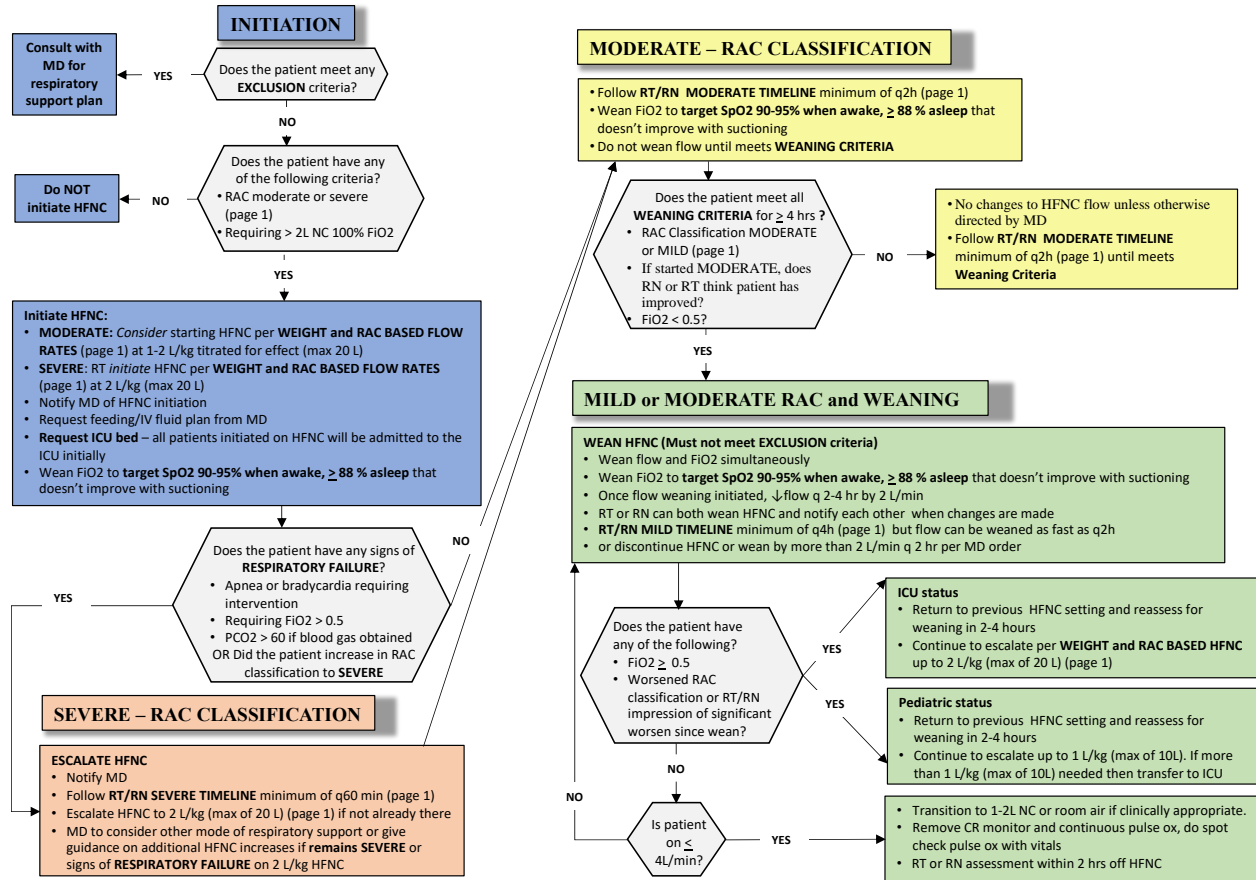

The portion of our institution protocol that show the guidelines for initiation, escalation, and weaning for patients with bronchiolitis who required high flow nasal cannula (HFNC) therapy.  
 Copyright Heather Siefkes

eFigure 2a: Respiratory Assessment Classification (RAC)

| <b>RESPIRATORY ASSESSMENT CLASSIFICATION (RAC)</b>                                                                                                                                                                                                                                                      |               |                            |                           |                                               |
|---------------------------------------------------------------------------------------------------------------------------------------------------------------------------------------------------------------------------------------------------------------------------------------------------------|---------------|----------------------------|---------------------------|-----------------------------------------------|
| Can be used on patients on and off HFNC. If patient requires suctioning, use post-suctioning classification. Preferably classify when the child is calm unless child is inconsolable.                                                                                                                   |               |                            |                           |                                               |
| <b>ASSESSMENT COMPONENTS</b>                                                                                                                                                                                                                                                                            |               | <b>CLASSIFICATION</b>      |                           |                                               |
|                                                                                                                                                                                                                                                                                                         |               | <b>Mild</b>                | <b>Moderate</b>           | <b>Severe</b>                                 |
| <b>AGE-BASED RR</b>                                                                                                                                                                                                                                                                                     | ≤ 3 months    | ≤ 60                       | 61-69                     | ≥ 70                                          |
|                                                                                                                                                                                                                                                                                                         | 4 – 12 months | ≤ 50                       | 51-59                     | ≥ 60                                          |
|                                                                                                                                                                                                                                                                                                         | > 12 months   | ≤ 40                       | 41-44                     | ≥ 45                                          |
| <b>WORK OF BREATHING</b>                                                                                                                                                                                                                                                                                |               | Normal OR mild retractions | Moderate retractions      | Severe retractions, head bobbing, OR grunting |
| <b>MENTAL STATUS</b>                                                                                                                                                                                                                                                                                    |               | Baseline                   | Fussy, anxious, OR sleepy | Lethargic (not just sleepy), OR inconsolable  |
| The HIGHEST score for any component determines the patient’s classification. A severe rating in any component would indicate a SEVERE classification. A mix of mild and moderate ratings would indicate a MODERATE classification. When in doubt, err on the side classifying a patient as more severe. |               |                            |                           |                                               |

Respiratory Assessment Classification (RAC) is based on three components: age-based respiratory rate/minute, work of breathing, and mental status. RAC defaulted to the highest severity classification based on individual components rather than adding up a cumulative score<sup>12</sup> and was adapted from an established response to intervention score.

*Copyright Heather Siefkes*

eFigure 2b: Weight and Respiratory Classification (RAC) Based Flow Rates

| <b>WEIGHT and RESPIRATORY CLASSIFICATION (RAC) BASED FLOW RATES</b>                                                                                                                                                                                                                                                                                                                                                                                                                                                                                                                              |                   |                                                     |                                                                                                      |
|--------------------------------------------------------------------------------------------------------------------------------------------------------------------------------------------------------------------------------------------------------------------------------------------------------------------------------------------------------------------------------------------------------------------------------------------------------------------------------------------------------------------------------------------------------------------------------------------------|-------------------|-----------------------------------------------------|------------------------------------------------------------------------------------------------------|
| <b>LOCATION</b>                                                                                                                                                                                                                                                                                                                                                                                                                                                                                                                                                                                  | <b>WEIGHT</b>     | <b>FLOW</b>                                         | <b>FIO2</b>                                                                                          |
| <b>MODERATE – Consider HFNC at the following</b>                                                                                                                                                                                                                                                                                                                                                                                                                                                                                                                                                 |                   |                                                     |                                                                                                      |
| <b>ICU or awaiting transfer*</b>                                                                                                                                                                                                                                                                                                                                                                                                                                                                                                                                                                 | <b>&lt; 10 kg</b> | RT can titrate 1-2 L/kg for effect                  | Initiate at 0.5                                                                                      |
|                                                                                                                                                                                                                                                                                                                                                                                                                                                                                                                                                                                                  | <b>≥ 10 kg</b>    | RT can titrate 1- 2 L/kg for effect<br><br>Max 20 L | Titrate for SpO2<br><br>90-95% awake<br><br>≥ 88% asleep<br><br>That doesn't improve with suctioning |
| <b>SEVERE – Start HFNC at the following</b>                                                                                                                                                                                                                                                                                                                                                                                                                                                                                                                                                      |                   |                                                     |                                                                                                      |
| <b>ICU or awaiting transfer</b>                                                                                                                                                                                                                                                                                                                                                                                                                                                                                                                                                                  | <b>&lt; 10 kg</b> | 2 L/kg                                              | Initiate at 0.5                                                                                      |
|                                                                                                                                                                                                                                                                                                                                                                                                                                                                                                                                                                                                  | <b>≥ 10 kg</b>    | 20 L                                                | Titrate for SpO2<br><br>90-95% awake<br><br>≥ 88% asleep<br><br>That doesn't improve with suctioning |
| <p>Round to nearest whole number flow for weight-based flows.<br/>                     Examples for MODERATE: 4.6 kg x 1 L/kg = 5L    12.5 kg x 1 L/kg = 13 L<br/>                     Example for SEVERE: 4.6 kg x 2 L/kg = 9 L    12.5 kg = 20 L<br/>                     Titrate FiO2 to <b>target SpO2 90-95%</b>. Consider escalation of flow rate if FiO2 &gt; 0.5<br/>                     *A patient can be transferred to floor on HFNC after meeting “out of ICU” criteria and can be on a maximum flow of 1 L/kg (max of 10L if &gt; 10 kg) before transfer back to ICU is needed</p> |                   |                                                     |                                                                                                      |

eTable1: Summary of Plan-Do-Study-Act Cycles

| <b>Cycle</b>           | <b>Plan/Do</b>                                                                                                                   | <b>Study</b>                                                                                    | <b>Act</b>                                                                                                                                                           |
|------------------------|----------------------------------------------------------------------------------------------------------------------------------|-------------------------------------------------------------------------------------------------|----------------------------------------------------------------------------------------------------------------------------------------------------------------------|
| PDSA 1<br>(Dec 2018)   | Initial rollout of protocol in PICU and ED                                                                                       | Received feedback on difficulty following RAC for patient                                       | ADAPT Simplified RAC and modified protocol                                                                                                                           |
| PDSA 2<br>(Jan 2019)   | Reviewed patients on initial protocol                                                                                            | Favorable response from team on 2 <sup>nd</sup> version HFNC protocol                           | ADAPT protocol to highlight weaning by SpO <sub>2</sub> in 2 <sup>nd</sup> version                                                                                   |
|                        | Reviewed simplified scoring tool and protocol                                                                                    | Patients not weaned for SpO <sub>2</sub> 90-95% per protocol                                    | ADOPT                                                                                                                                                                |
| PDSA 3<br>(March 2019) | Initiated 2 <sup>nd</sup> version of protocol in PICU and ED                                                                     | Positive response from users on revised protocol                                                | ADAPT Protocol to clarify weaning parameters and remove barriers to weaning                                                                                          |
|                        |                                                                                                                                  | Staff requested scoring tool in EMR                                                             | Discussion to add scoring tool in EMR                                                                                                                                |
|                        |                                                                                                                                  | Suggestion of multidisciplinary training                                                        | Planning for M&M session to discuss QI effort, review current literature on bronchiolitis                                                                            |
| PDSA 4<br>(Sept 2019)  | Near real-time identification and feedback of protocol violations                                                                | Identified issues contributing to protocol compliance and difficulty with utilizing paper forms | ADAPT Daily QI rounds to rounds to discuss patients on protocol and provide in-the-moment feedback with nurses and RTs with the goal to increase protocol compliance |
|                        | Began education to nurses and RTs on wards in anticipation of transferring patients out of ICU on HFNC in subsequent PDSA cycles | Identified issues contributing to protocol compliance and difficulty with utilizing paper forms |                                                                                                                                                                      |

|                      |                                                                                                                |                                                                                                                                                                                  |                                                                                                      |
|----------------------|----------------------------------------------------------------------------------------------------------------|----------------------------------------------------------------------------------------------------------------------------------------------------------------------------------|------------------------------------------------------------------------------------------------------|
|                      | Continue work with EMR to build HFNC flowsheet                                                                 | Identified stakeholders involved in building components of RAC in EMR                                                                                                            | ADAPT<br>Daily QI rounds to improve utilization of paper form until EMR tool is enabled              |
| PDSA 5<br>(Oct 2019) | Held 4-hour symposium on bronchiolitis for residents/attendings, nurses, and RTs                               | Positive response to education and presentation                                                                                                                                  | ADAPT<br>Patient transferring out to rounds on HFNC when                                             |
| PDSA 6<br>(Nov 2019) | Started transfer out of ICU<br>Increased education with monthly teaching to residents on bronchiolitis         | Positive response to QI rounds and education                                                                                                                                     | ADOPT                                                                                                |
| PDSA 7<br>(Dec 2019) | Modified paper scoring sheet to better meet the needs of RNs/RT<br>Increased visualization of protocol binders | Nurses expressing concerns with not being familiar with protocol                                                                                                                 | ADAPT<br>Tip sheet for protocol, learning module, more one-on-one education, and protocol refreshers |
| PDSA 8<br>(Jan 2020) | Increased education on protocol for residents and other members of the care team.                              | Identified protocol adherence <80% and issues identified include HFNC initiated without notifying resident/attending, poor adherence during transition to day-night or night-day | ADAPT<br>Education for nurses and RT                                                                 |
| PDSA 9<br>(Feb 2020) | Increased visibility of protocol in workspace for residents                                                    | Aborted QI rounds due to need for social distancing during COVID19 pandemic                                                                                                      | ADOPT                                                                                                |

ED = Emergency Department, EMR = Electronic Medical Record, HFNC = high flow nasal cannula, QI = quality improvement, M&M = Morbidity and mortality, PDSA = Plan-Do-Study-Act, RAC = Respiratory Assessment Classification, RN = nurse, RT = respiratory therapist, SpO<sub>2</sub> = Oxygen saturation
